# Supplementary material for: VEGF amplifies transcription through ETS1 acetylation to enable angiogenesis
Source: PubMed Central journal article supplement (PMC5575285; doi:10.1038/s41467-017-00405-x), 2017-08-29
Supplement: 41467_2017_405_MOESM1_ESM.pdf [file 41467_2017_405_MOESM1_ESM.pdf]

File Name: Supplementary Information

Description: Supplementary Figures and Supplementary Tables.

File Name: Peer Review File

Description:

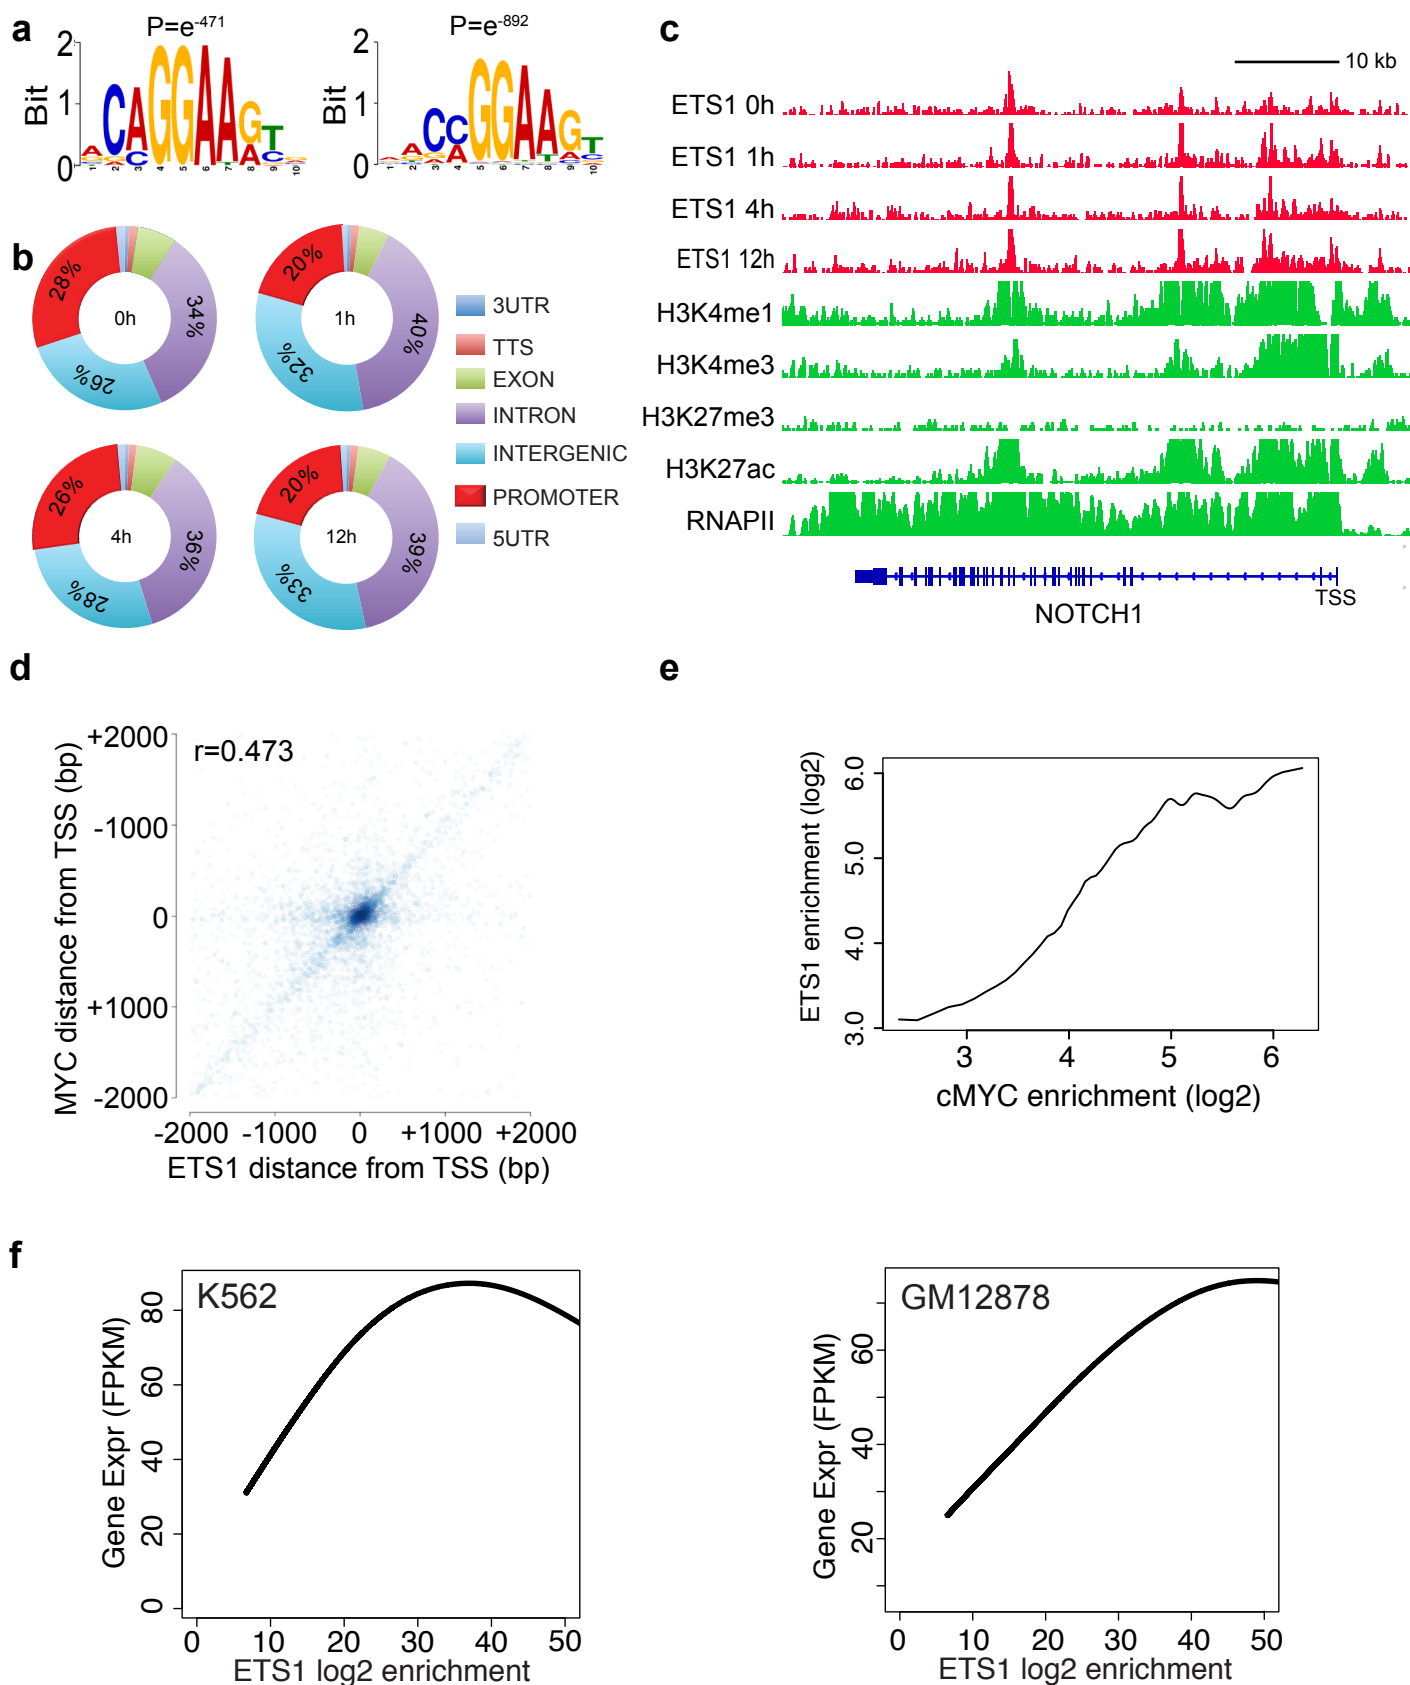

**Supplementary. Fig. 1. ETS1 preferentially occupied promoters and correlated with transcription.**

- a.** The ETS motif was highly enriched in HUVEC ETS1 ChIP-seq peaks.
- b.** ETS1 bound regions at 0, 1, 4, and 12 hours with respect to genome annotations.
- c.** Genome browser view of *NOTCH1* genomic region occupancy by ETS1 and modified histones.
- d.** Relationship of MYC and ETS1 ChIP-seq peaks at gene promoters. Most peaks for ETS1 and MYC overlapped in promoters.
- e.** Correlation between MYC enrichment and ETS1 enrichment at gene promoters.
- f.** Correlation of gene expression to ETS1 promoter occupancy in K562 or GM12878 cell lines.

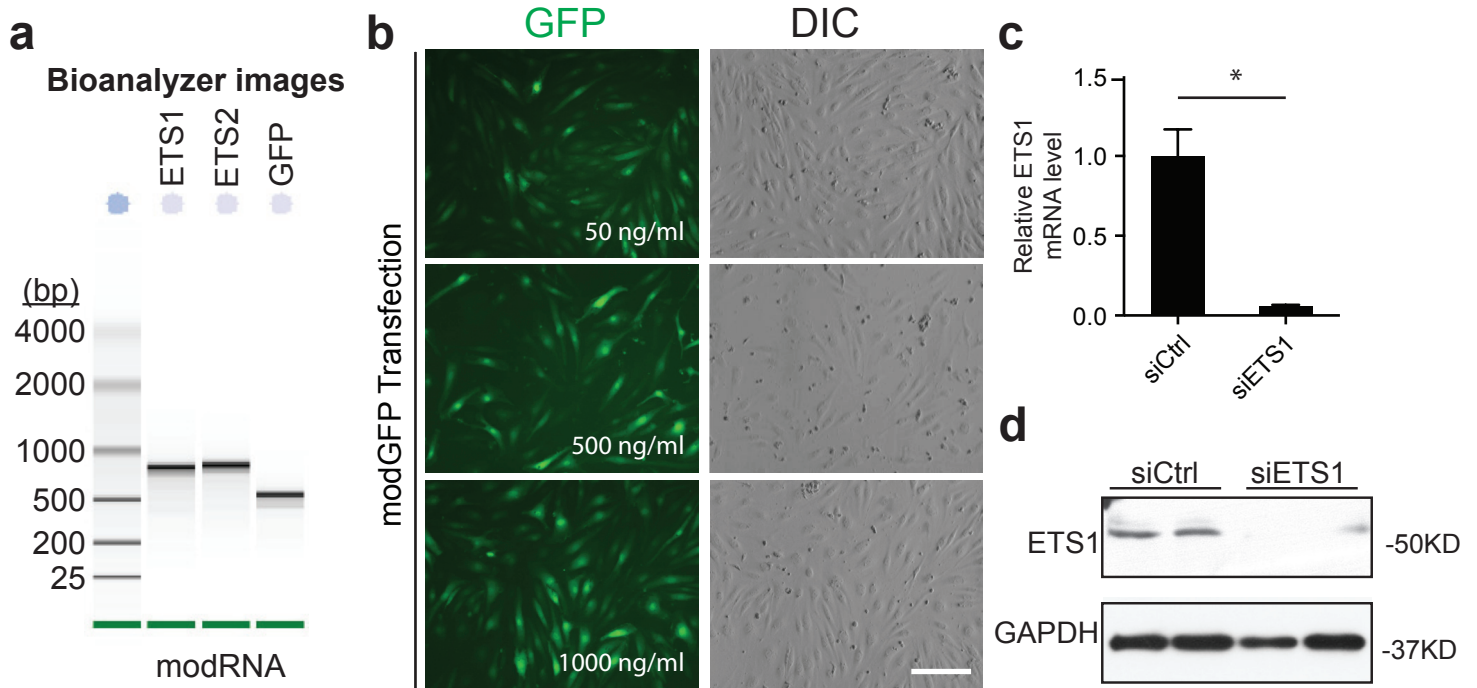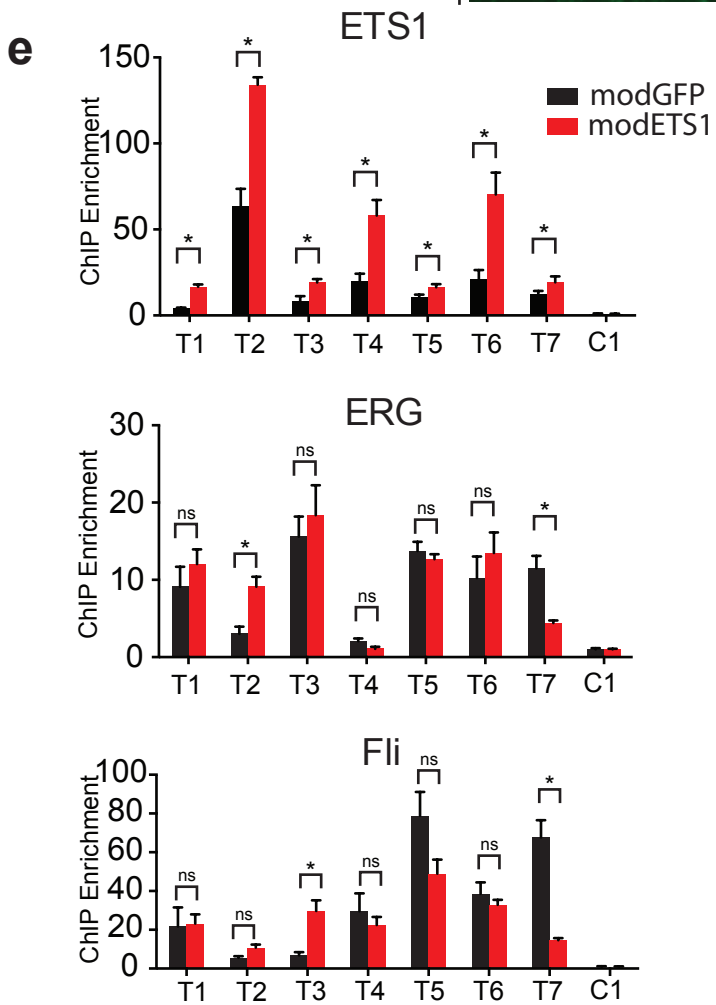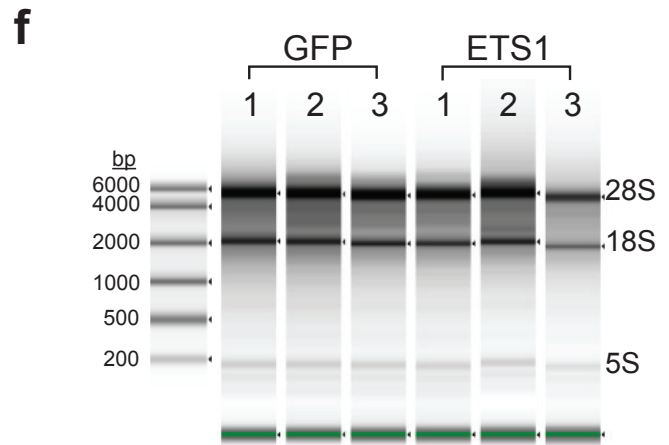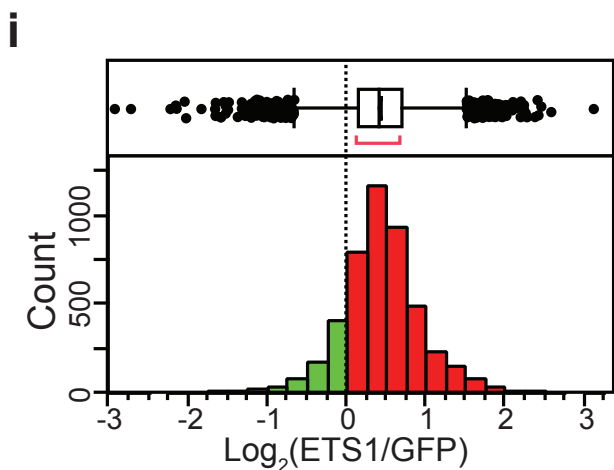

**Supplementary Fig. 2. Increasing ETS1 using modified mRNA (modRNA) transfection increased mRNA abundance in HUVEC cells.**

- a.** Bioanalyzer evaluation of ETS1, ETS2, and GFP modRNAs, synthesized by in vitro transcription.
- b.** Epifluorescent and phase images of HUVEC transfected by different doses of modRNA. Transfection was highly efficient, non-toxic, and peak translated protein was observed within several hours. Bar = 200  $\mu$ m.
- c-d.** ETS1 depletion in HUVEC by siRNA at the mRNA (c) and protein (d) levels. Student's t-test: \*,  $P < 0.05$ .  $n = 3$ . Error bars: s.e.m.
- e.** ChIP-qPCR measurement of ETS1, ERG, and FLI chromatin occupancy. Seven sites (T1-T7) and a negative control site (C1) were selected by their occupancy by ERG and FLI in HUVEC and by ETS1 in ETS1 modRNA-treated HUVEC. ChIP-qPCR was performed in HUVEC treated with modRNA encoding ETS1 or GFP. Student's t-test: \*,  $P < 0.05$ . ns, not significant.  $n = 3$ . Error bars: s.e.m.
- f.** Tape station analysis of RNA. Total RNA from  $2 \times 10^5$  cells were extracted with miRNA Easy Mini Kit and applied to Agilent 2200 Tape Station RNA ChiP
- g.** Quantification of total RNA by Tape Station. ns, not significant by Student's t-test.  $n = 3$ . Error bars: s.d.
- h.** Quantification of rRNA by Tape Station. ns, not significant by Student's t-test.  $n = 3$ . Error bars: s.d.
- i.** RNA-seq data were used to calculate fold-change of gene expression by ETS1 overexpression. Genes with FPKM  $< 2$  in either group were excluded. The expression of 84% of genes increased ( $\log_2$  FC  $> 0$ ) and 16% decreased.

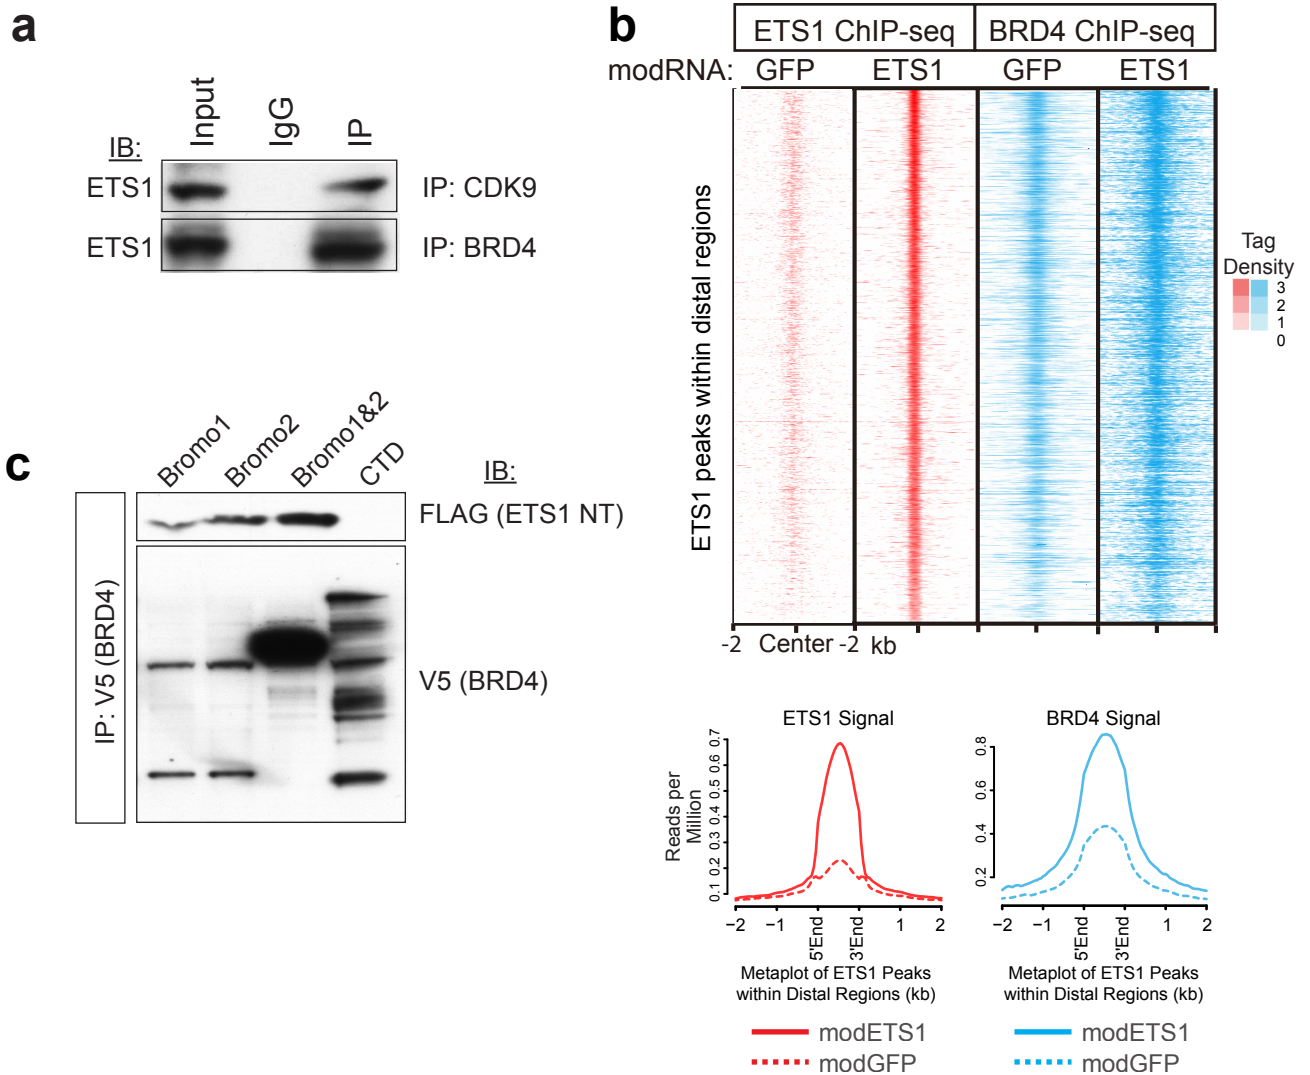

### Supplementary Fig. 3. ETS1 binds and recruits BRD4 to chromatin.

- a.** BRD4 or CDK9 co-immunoprecipitated ETS1 from HUVECs. HUVEC nuclear extracts were incubated with BRD4 or CDK9 antibody. Immunoprecipitates were probed with ETS1 antibody.
- b.** BRD4 and ETS1 co-occupied chromatin in distal regions, and ETS1 modRNA over-expression stimulated BRD4 co-occupancy. Top panel, tag heat map of distal ETS1 regions. Bottom panels, aggregation plots for ETS1 or BRD4 signal in distal ETS1 regions of HUVECs treated with modGFP or modETS1.
- c.** BRD4 co-immunoprecipitated ETS1 NT domain. 293T cells were transfected with expression constructs encoding FLAG-ETS1-NT domain and the indicated V5-tagged BRD4 domains. V5 immunoprecipitates were probed for ETS1-NT co-precipitation using FLAG antibody.

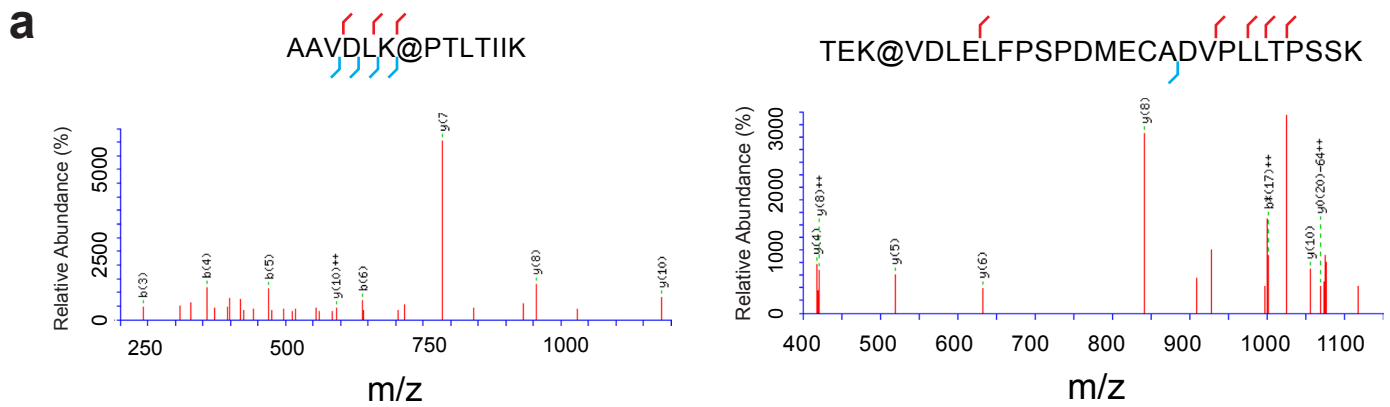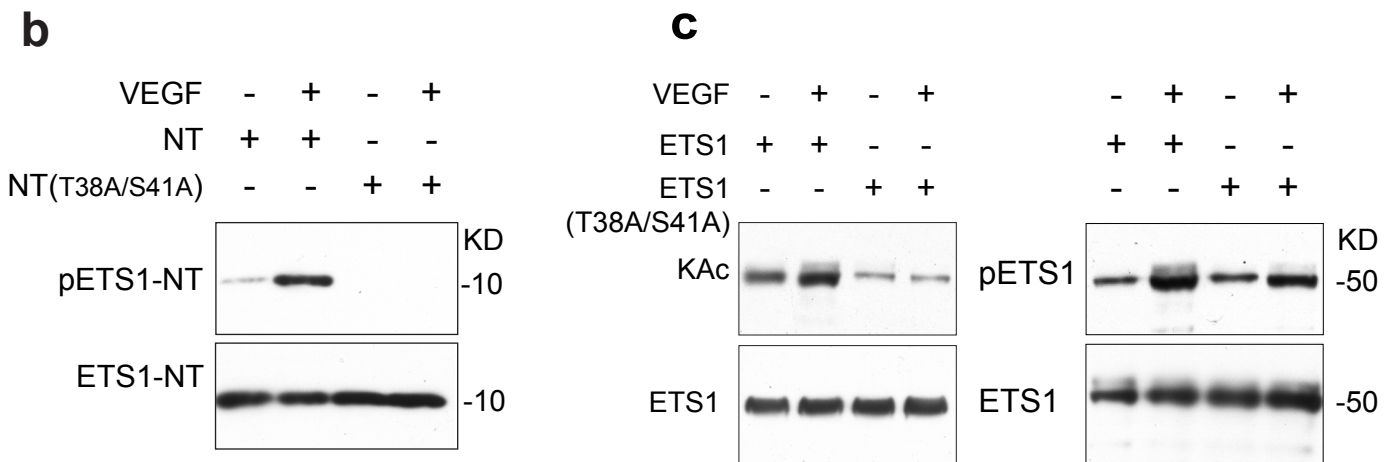

**Supplementary Fig. 4. VEGF stimulated ETS1 phosphorylation and acetylation.**

- a.** Mass spectrum of the two major acetylated ETS1 fragments. ETS1 was immunoprecipitated from HUVECs in EGM-2 media (which contains VEGF) and analyzed by mass spectroscopy. These fragments map to the NT domain of ETS1. @ indicates the detected acetylation site. Lines in the fragment sequence indicate ionized fragments detected by LTQ Orbitrap.
- a.** VEGF stimulated ETS1 phosphorylation at T38 and S41. HUVECs were transfected with expression constructs encoding ETS1 NT domain or a mutant lacking ERK phosphorylation sites (T38A/S41A). ETS1 pT38 antibody (pETS1) was used to detect ERK-phosphorylated ETS1.
- b.** VEGF-stimulated ETS1 acetylation requires ERK T38 and S41 phosphorylation sites. (Left panel): Wild-type ETS1 was acetylated at baseline and this increased with VEGF treatment. T38A/S41A ETS1 had less baseline ETS1 and this did not increase with VEGF treatment. (Right panel): Wild-type ETS1 phosphorylation was increased by VEGF. T38A/S41A ETS1 phosphorylation also increased with VEGF, but to a lesser degree than wild-type. This suggests that T38 and S41 are the major but not exclusive sites of ETS1 that are phosphorylated downstream of VEGF.

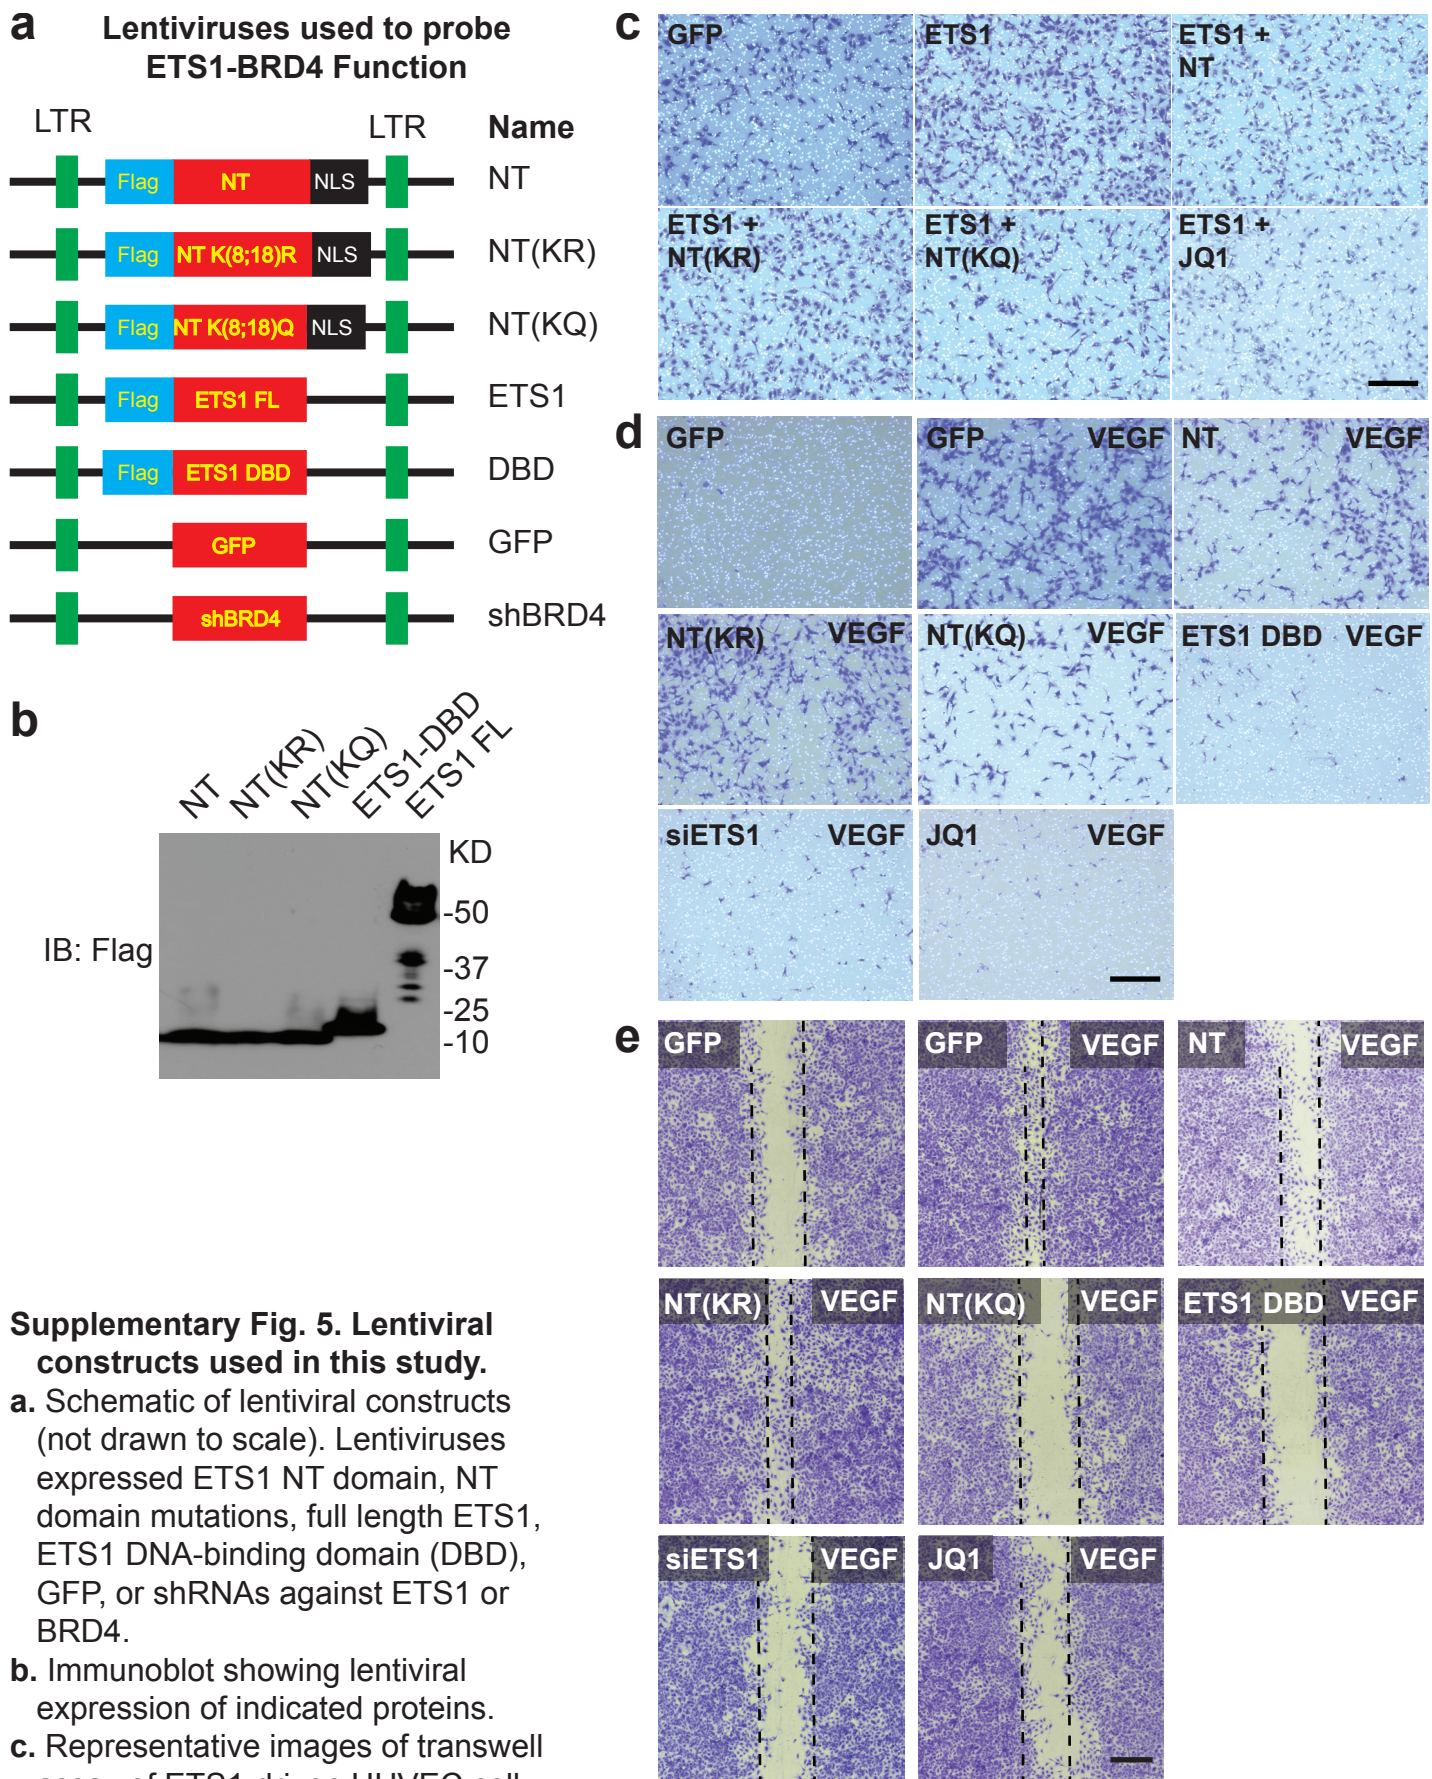

**Supplementary Fig. 5. Lentiviral constructs used in this study.**

- a.** Schematic of lentiviral constructs (not drawn to scale). Lentiviruses expressed ETS1 NT domain, NT domain mutations, full length ETS1, ETS1 DNA-binding domain (DBD), GFP, or shRNAs against ETS1 or BRD4.
- b.** Immunoblot showing lentiviral expression of indicated proteins.
- c.** Representative images of transwell assay of ETS1-driven HUVEC cell migration. The cell treatment is as indicated. Bar=250  $\mu$ m.
- d.** Representative images of transwell assay of VEGF-driven HUVEC cell migration. The cell treatment is as indicated. Bar=250  $\mu$ m.
- e.** Representative images of VEGF-driven HUVEC wound healing. The cell treatment is as indicated. Bar=500  $\mu$ m.

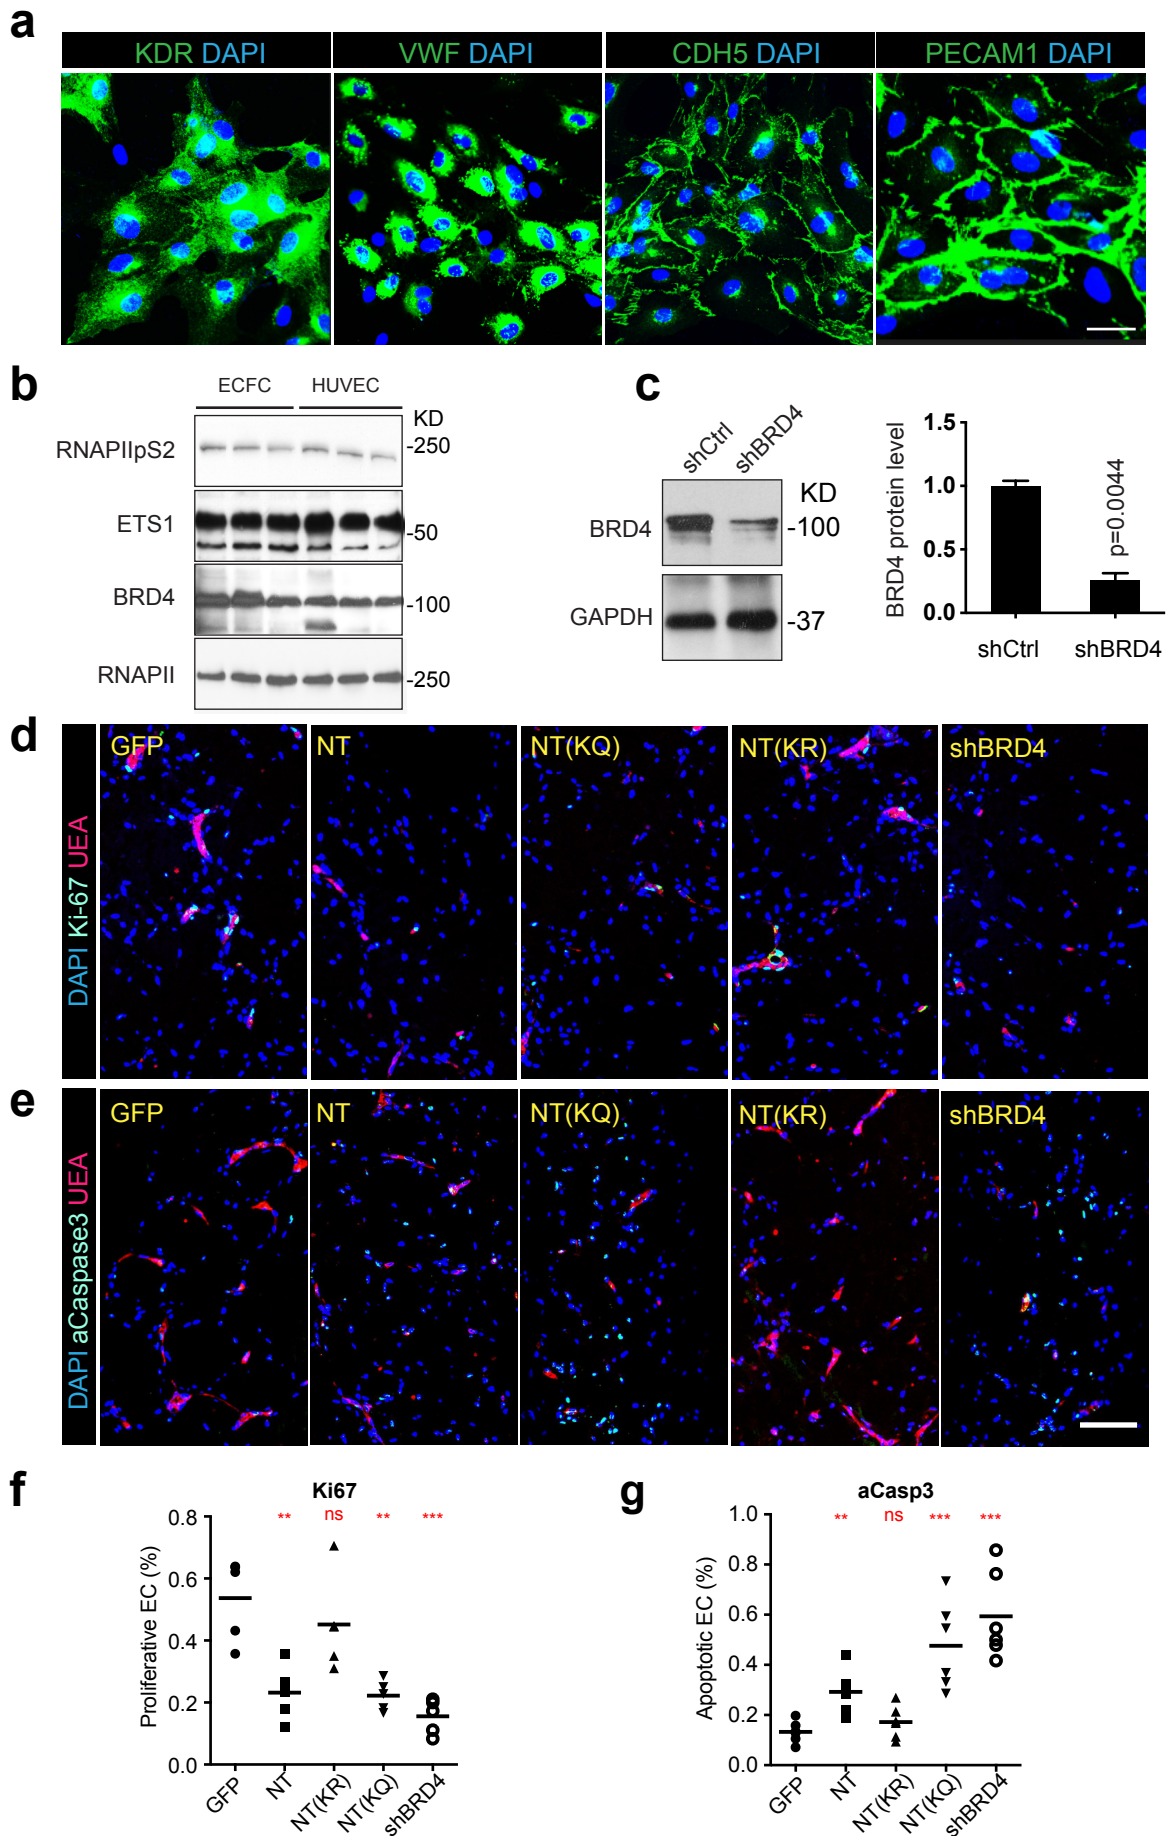

**Supplementary Fig. 6. Vessel assembly in matrigel plug assay required ETS-BRD4 interaction and BRD4 activity.**

**a.** ECFCs uniformly expressed the endothelial markers of KDR, VWF, CDH5 and PECAM1. Bar = 100  $\mu$ m.

**b.** ECFCs and HUVECs expressed similar levels of ETS1, BRD4, RNAPII, and RNAPIIpS2.

**c.** Lentivirus expressing shBRD4 reduced BRD4 protein. Student's t-test,  $n=3$ . Error bars: s.d.

**d-e.** Representative immunofluorescent staining of EC proliferation and apoptosis in matrigel plugs. Matrigel plug sections were stained for human ECs (UEA) and proliferation (Ki67) or apoptosis (activated Caspase 3) markers. Bar = 100  $\mu$ m.

**f-g.** Quantitative analysis of d-e. Student's t-test versus GFP: \*\*,  $p<0.01$ ; \*\*\*,  $P<0.001$ . ns, not significant.



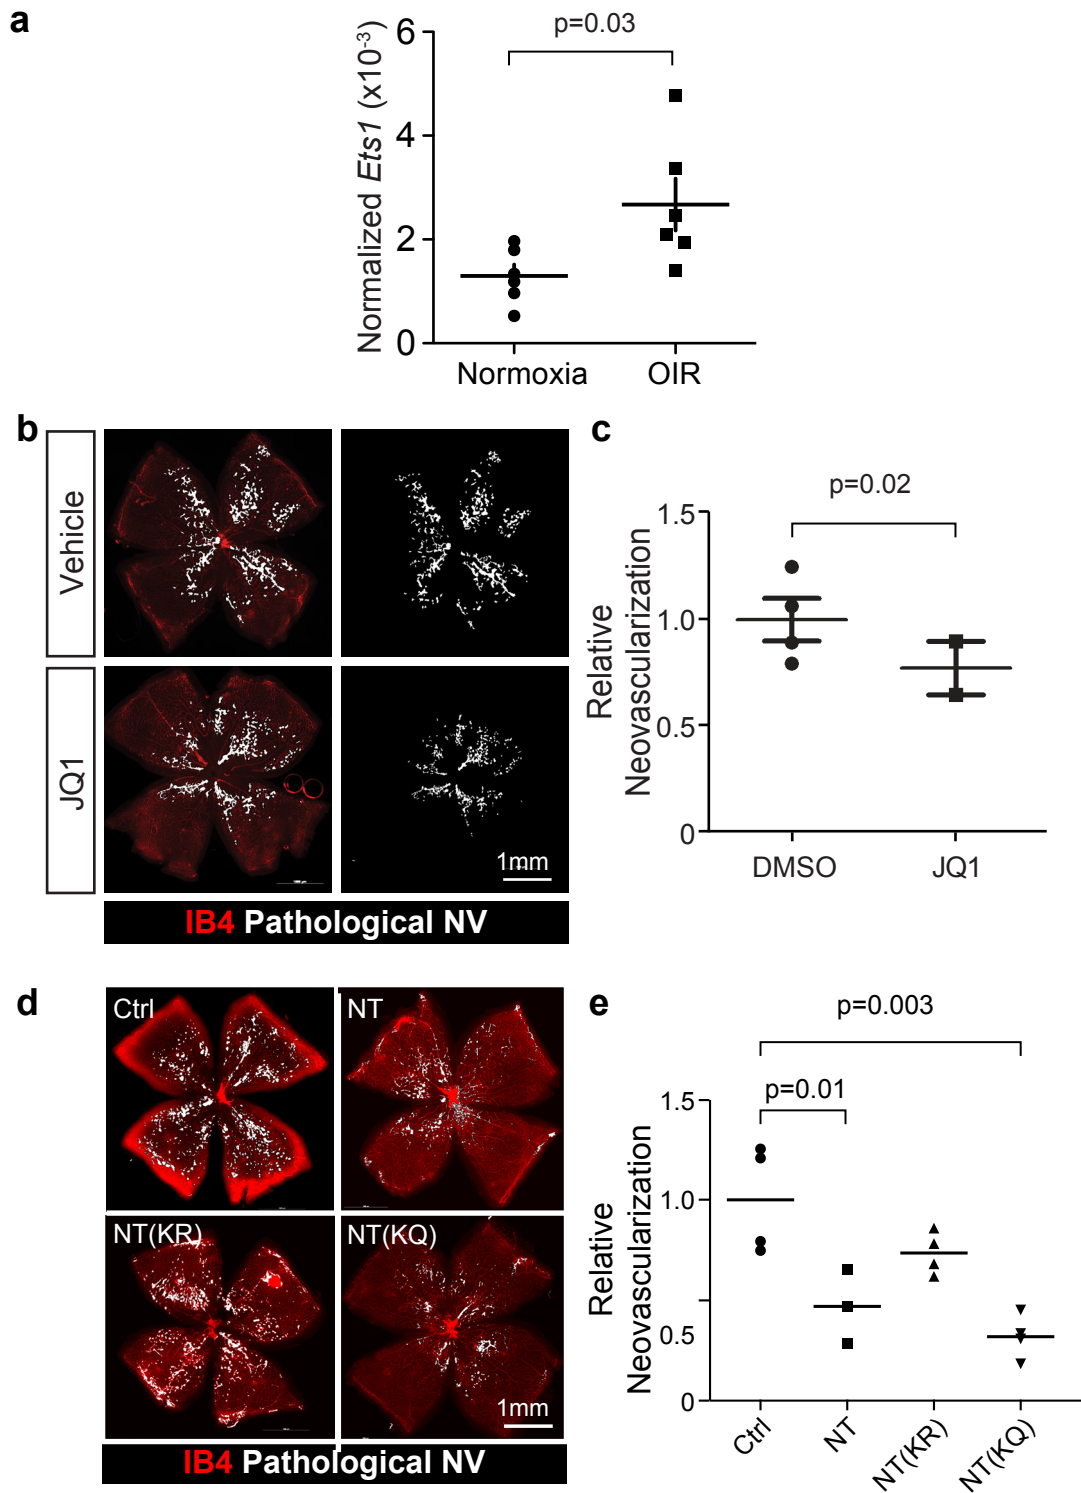

**Supplementary. Fig. 7. ETS1-BRD4 promote neovascularization in oxygen-induced retinopathy.**

- a.** *Ets1* transcript level in control and OIR retina at postnatal day 17, relative to *Gapdh*. n=6. Student's t-test.
- b.** Representative images of OIR retinas from mice treated with vehicle or JQ1. Retinas were stained with isolectin IB4 to visualize vessels. Pathological neovascularization (NV), identified using the SWIFT NV ImageJ plug-in, is colored white. Bar = 1 mm.
- c.** Quantification of neovascularization in OIR retinas from control or JQ1-treated mice. Student's t-test. n=4.
- d.** Representative images of OIR retinas from mice treated with the indicated lentivirus, injected intravitreally into the retina. Bar = 1 mm.
- e.** Quantification of neovascularization in OIR retinas from lentivirus-treated mice. NT and NT(KQ) but not NT(KR) lentiviruses reduced OIR retinopathy. Student's t-test. n=4.

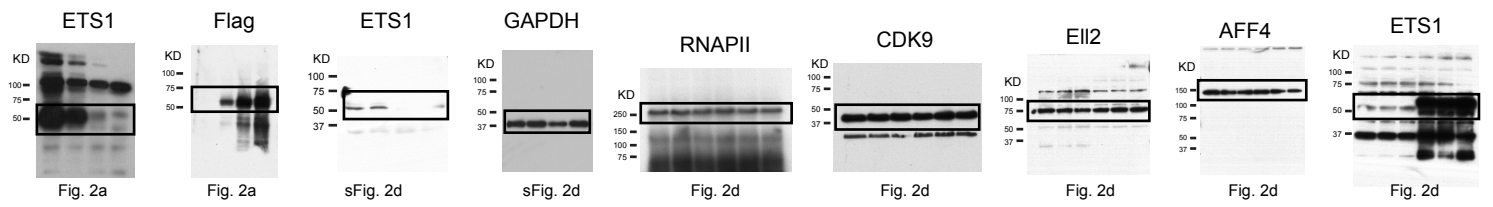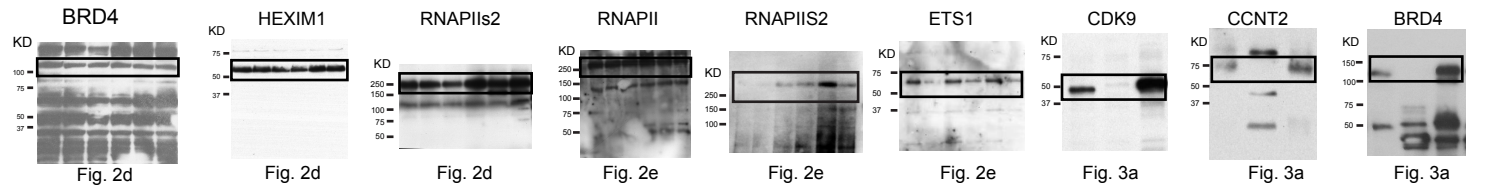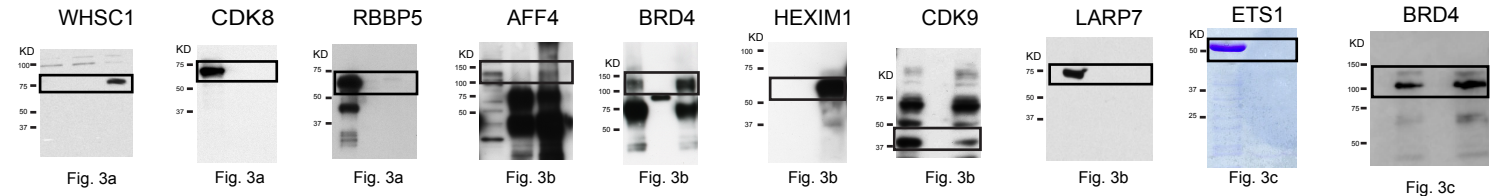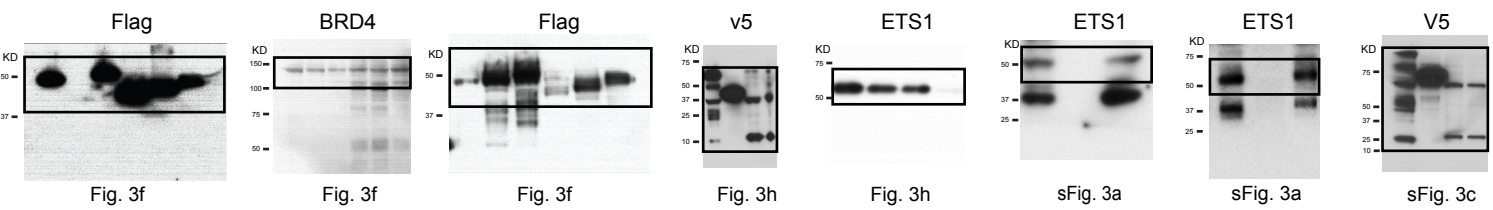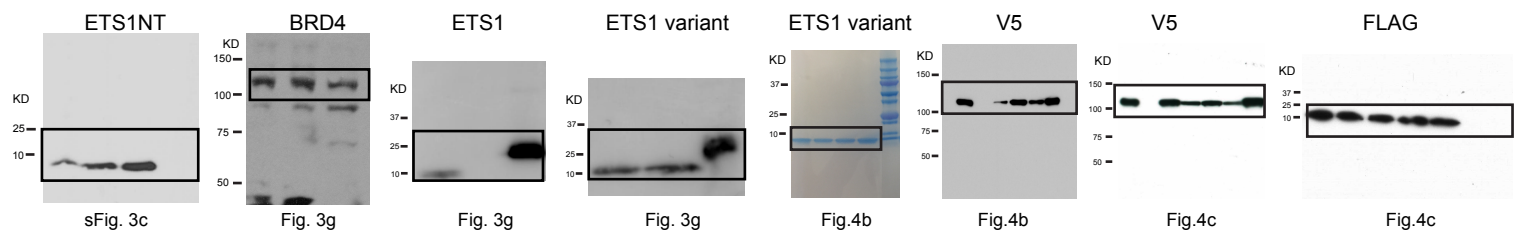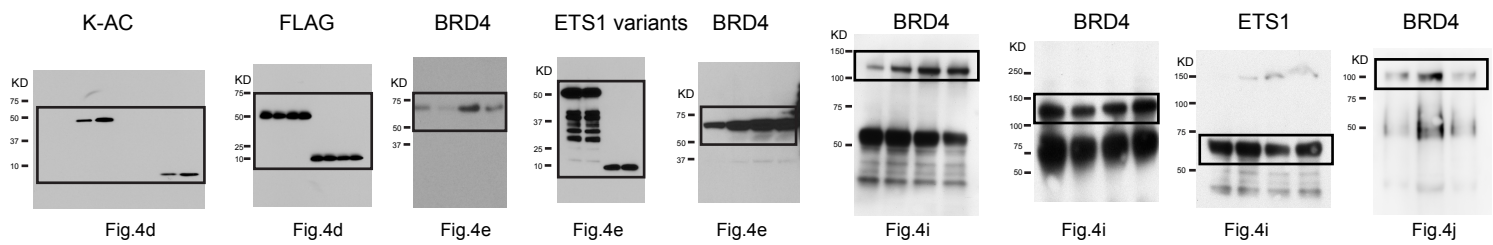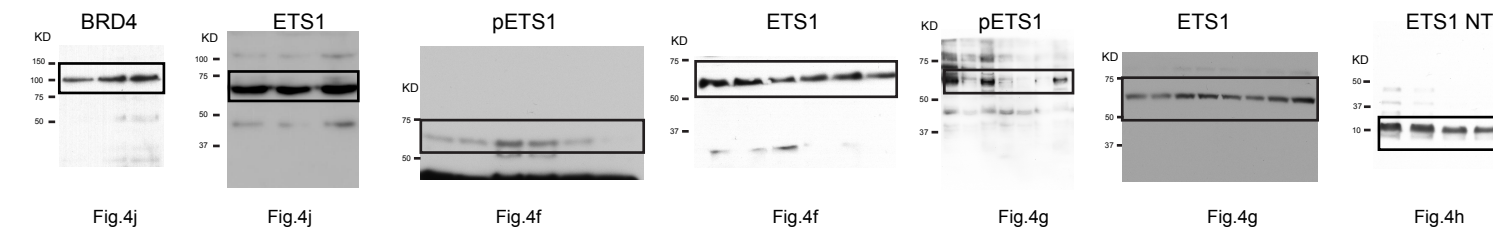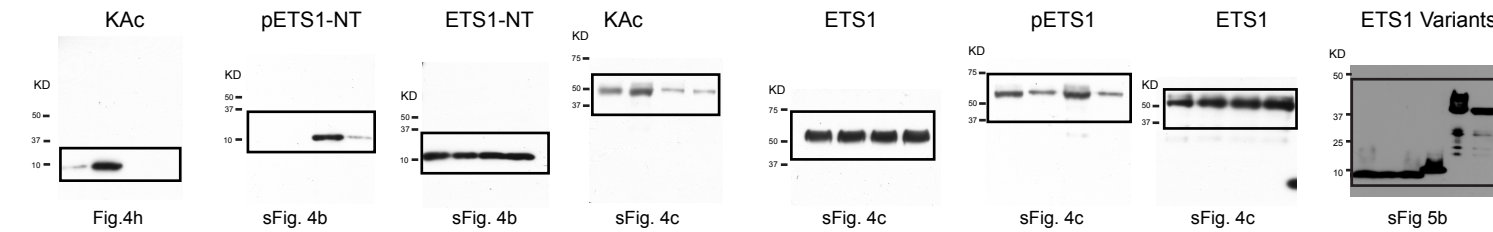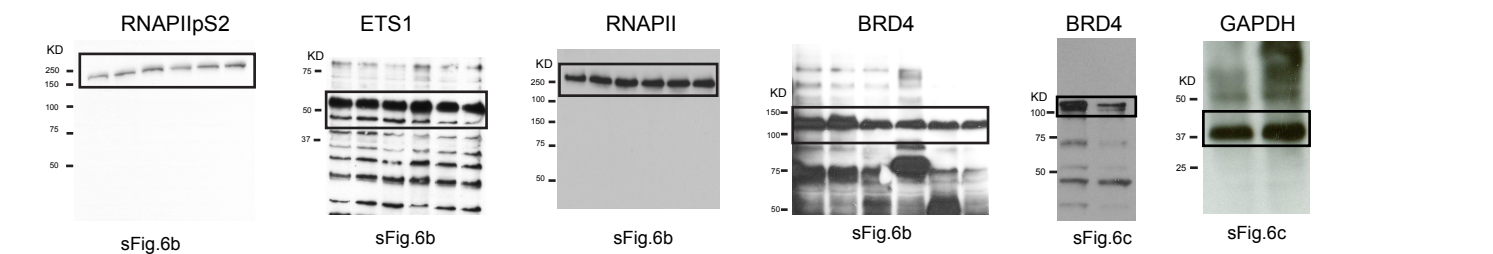

**Supplementary Fig. 8. Uncropped western blots.** Original images for the western blots used in this study. Rectangles indicate approximate regions that were used in the final figures. The protein blotted is shown at the top of each image, and the figure is shown at the bottom.

## Supplementary Table 1. Next Generation Datasets Used In This Study

| Description | ChiP antibody | Treatment  | Method   | Reference  | Accession |
|-------------|---------------|------------|----------|------------|-----------|
|             |               |            |          |            | Number    |
| HUVEC       | RNAPII        | modGFP     | ChiP-seq | This study |           |
| HUVEC       | RNAPII        | modETS1    | ChiP-seq | This study |           |
| HUVEC       | RNAPII        | siRNA CTRL | ChiP-seq | This study |           |
| HUVEC       | RNAPII        | siETS1     | ChiP-seq | This study |           |
| HUVEC       | ETS1          | modGFP     | ChiP-seq | This study |           |
| HUVEC       | ETS1          | modETS1    | ChiP-seq | This study |           |
| HUVEC       | Brd4          | modGFP     | ChiP-seq | This study |           |
| HUVEC       | Brd4          | modETS1    | ChiP-seq | This study |           |
| HUVEC       | ETS1          | VEGF 0h    | ChiP-seq | Zhang 2013 | GSE41166  |
| HUVEC       | ETS1          | VEGF 1h    | ChiP-seq | Zhang 2013 | GSE41166  |
| HUVEC       | ETS1          | VEGF 4h    | ChiP-seq | Zhang 2013 | GSE41166  |
| HUVEC       | ETS1          | VEGF 12h   | ChiP-seq | Zhang 2013 | GSE41166  |
| HUVEC       | H3K27ac       | VEGF 0h    | ChiP-seq | Zhang 2013 | GSE41166  |
| HUVEC       | H3K4me1       | VEGF 0h    | ChiP-seq | This study |           |
| HUVEC       | H3K4me2       | VEGF 0h    | ChiP-seq | This study |           |
| HUVEC       | H3K4me3       | VEGF 0h    | ChiP-seq | This study |           |
| HUVEC       | H3K27me3      | VEGF 0h    | ChiP-seq | This study |           |
| HUVEC       | H3K36me3      | VEGF 0h    | ChiP-seq | This study |           |
| HUVEC       | NA            | modETS1    | RNA-seq  | This study |           |
| HUVEC       | NA            | modGFP     | RNA-seq  | This study |           |
| HUVEC       | NA            | VEGF 0h    | RNA-seq  | Zhang 2013 | GSE41166  |
| HUVEC       | NA            | VEGF 1h    | RNA-seq  | Zhang 2013 | GSE41166  |
| HUVEC       | NA            | VEGF 4h    | RNA-seq  | Zhang 2013 | GSE41166  |
| HUVEC       | NA            | VEGF 12h   | RNA-seq  | Zhang 2013 | GSE41166  |
| K562        | ETS1          | NA         | ChiP-seq | ENCODE     | GSM803442 |
| K562        | NA            | NA         | RNA-seq  | ENCODE     |           |
| GM12878     | ETS1          | NA         | ChiP-seq | ENCODE     | GSM803510 |
| GM12878     | NA            | NA         | RNA-seq  | ENCODE     |           |

**Supplementary Table 2. ETS1 K8 and K18 lysine acetylation identified by mass spectroscopy.**

3x-FLAG-ETS1 and CBP were co-transfected in 293T cells. Afinity-purified 3x-FLAG-ETS1 was analyzed by mass spectroscopy. Data on selective peptides that support K8 and K18 acetylation are shown. @, acetyl-lysine. \*, oxidized methionine. Periods indicate the start and end points of the peptide sequence that was identified.

| ScanF | z | XCorr | ΔCorr | Ref. | Intensity | ModScore                         | Peptide | Site 1 Score | Site 2 Score |
|-------|---|-------|-------|------|-----------|----------------------------------|---------|--------------|--------------|
| 10501 | 3 | 1.869 | 0.31  | ETS1 | 1.46E+05  | R.YYYDK@NIIHK.T                  |         | 1000         | 0            |
| 14726 | 3 | 4.774 | 0.034 | ETS1 | 1.18E+06  | R.VPSYDSFDSYDPAALPNHK@PK.G       |         | 1000         | 0            |
| 11212 | 2 | 1.604 | 0.808 | ETS1 | 1.69E+06  | R.LGIPK@DPR.Q                    |         | 1000         | 0            |
| 14845 | 2 | 5.906 | 0.846 | ETS1 | 7.50E+06  | R.GK@LGGQDSFESIESYDSCDR.L        |         | 1000         | 0            |
| 15023 | 2 | 5.843 | 0.843 | ETS1 | 7.50E+06  | R.GK@LGGQDSFESIESYDSCDR.L        |         | 1000         | 0            |
| 14495 | 3 | 4.06  | 0.604 | ETS1 | 1.03E+05  | R.GK@LGGQDSFESIESYDSCDR.L        |         | 1000         | 0            |
| 15152 | 2 | 5.006 | 0.796 | ETS1 | 7.50E+06  | R.GK@LGGQDSFESIESYDSCDR.L        |         | 1000         | 0            |
| 24357 | 3 | 4.553 | 0.603 | ETS1 | 15019     | K.TEK@VDLELFPSPDM*ECADVPLLTSSK.E |         | 1000         | 0            |
| 22856 | 3 | 2.511 | 0.389 | ETS1 | 8.74E+05  | K.TEK@VDLELFPSPDM*ECADVPLLTSSK.E |         | 1000         | 0            |
| 24476 | 3 | 3.315 | 0.506 | ETS1 | 15019     | K.TEK@VDLELFPSPDM*ECADVPLLTSSK.E |         | 1000         | 0            |
| 23949 | 3 | 4.377 | 0.537 | ETS1 | 34039.1   | K.TEK@VDLELFPSPDM*ECADVPLLTSSK.E |         | 1000         | 0            |
| 22758 | 3 | 2.413 | 0.435 | ETS1 | 8.74E+05  | K.TEK@VDLELFPSPDM*ECADVPLLTSSK.E |         | 1000         | 0            |
| 6818  | 2 | 2.002 | 0.574 | ETS1 | 1.93E+05  | K.M*NYEK@LSR.G                   |         | 1000         | 0            |
| 19855 | 3 | 4.859 | 0.623 | ETS1 | 2.67E+05  | K.GVDFQK@FCMNGAALCALGK.D         |         | 1000         | 0            |
| 11612 | 2 | 1.908 | 0.587 | ETS1 | 2.16E+06  | K.GTFK@DYVR.D                    |         | 1000         | 0            |
| 18499 | 2 | 4.26  | 0.515 | ETS1 | 45552.6   | K.EM*M*SQALK@ATFSGFTK.E          |         | 1000         | 0            |
| 11048 | 3 | 4.425 | 0.558 | ETS1 | 3.28E+05  | K.EDVK@PYQVNGVNPAYPESR.Y         |         | 1000         | 0            |
| 10477 | 3 | 5.133 | 0.659 | ETS1 | 9.95E+05  | K.EDVK@PYQVNGVNPAYPESR.Y         |         | 1000         | 0            |
| 9951  | 2 | 1.788 | 0.533 | ETS1 | 67653.9   | K.ATFSGFTK@.E                    |         | 1000         | 0            |
| 22047 | 2 | 2.995 | 0.459 | ETS1 | 2.06E+05  | K.AAVDLK@PTLTIK.T                |         | 1000         | 0            |
| 19918 | 2 | 1.817 | 0.428 | ETS1 | 5.94E+06  | K.AAVDLK@PTLTIK.T                |         | 1000         | 0            |
| 20024 | 2 | 1.642 | 0.402 | ETS1 | 5.94E+06  | K.AAVDLK@PTLTIK.T                |         | 1000         | 0            |
| 21944 | 2 | 1.365 | 0.499 | ETS1 | 2.06E+05  | K.AAVDLK@PTLTIK.T                |         | 1000         | 0            |
| 20141 | 2 | 1.262 | 0.054 | ETS1 | 5.94E+06  | K.AAVDLK@PTLTIK.T                |         | 1000         | 0            |
| 18610 | 2 | 4.301 | 0.628 | ETS1 | 3.76E+05  | R.TGM*K@AAVDLKPTLTIK.T           |         | 146.622      | 0            |
| 18857 | 2 | 3.769 | 0.147 | ETS1 | 1.67E+05  | K.AAVDLKPTLTIK@TEK.V             |         | 93.154       | 0            |
| 20258 | 3 | 3.113 | 0.528 | ETS1 | 1.30E+05  | R.TGMK@AAVDLKPTLTIK.T            |         | 62.659       | 0            |
| 5751  | 4 | 5.988 | 0.263 | ETS1 | 3.67E+07  | -.MDYK@DHDGDYKDHDIDYKDDDDKGR.T   |         | 58.699       | 0            |
| 20798 | 3 | 3.499 | 0.121 | ETS1 | 64357.5   | R.TGMK@AAVDLKPTLTIK@TEK.V        |         | 52.403       | 75.738       |
| 18556 | 3 | 2.897 | 0.528 | ETS1 | 5.30E+06  | R.TGM*K@AAVDLKPTLTIK.T           |         | 52.403       | 0            |
| 18817 | 3 | 3.296 | 0.115 | ETS1 | 6.25E+05  | K.AAVDLKPTLTIK@TEK.V             |         | 46.129       | 0            |
| 6033  | 5 | 4.133 | 0.277 | ETS1 | 1.00E+08  | -.MDYK@DHDGDYKDHDIDYKDDDDKGR.T   |         | 28.986       | 0            |
| 5519  | 4 | 3.636 | 0.445 | ETS1 | 1.87E+07  | -.M*DYK@DHDGDYKDHDIDYKDDDDK.G    |         | 27.149       | 0            |
| 6299  | 4 | 3.361 | 0.268 | ETS1 | 4.38E+06  | -.MDYK@DHDGDYKDHDIDYKDDDDK.G     |         | 27.133       | 0            |
| 19244 | 3 | 3.012 | 0.065 | ETS1 | 6.59E+05  | R.TGM*K@AAVDLKPTLTIK@TEK.V       |         | 26.105       | 37.549       |
| 4199  | 4 | 2.747 | 0.187 | ETS1 | 33306.5   | K.DHDGDYKDHDIDYK@DDDDKGR.T       |         | 22.529       | 0            |
| 4214  | 4 | 2.697 | 0.046 | ETS1 | 14620.9   | K.DHDGDYKDHDIDYK@DDDDKGR.T       |         | 22.529       | 0            |
| 4309  | 4 | 2.315 | 0.199 | ETS1 | 4422.8    | K.DHDGDYKDHDIDYKDDDDK@GR.T       |         | 21.746       | 0            |
| 4025  | 4 | 2.813 | 0.232 | ETS1 | 3.80E+07  | -.M*DYK@DHDGDYKDHDIDYKDDDDKGR.T  |         | 21.671       | 0            |
| 3552  | 5 | 3.192 | 0.233 | ETS1 | 7.04E+07  | -.M*DYK@DHDGDYKDHDIDYKDDDDKGR.T  |         | 21.606       | 0            |
| 5691  | 5 | 4.132 | 0.368 | ETS1 | 7.04E+07  | -.M*DYK@DHDGDYKDHDIDYKDDDDKGR.T  |         | 21.606       | 0            |
| 4091  | 2 | 2.426 | 0.616 | ETS1 | 3.19E+05  | -.M@*DYKDHDGDYK.D                |         | 20.985       | 0            |
| 6035  | 3 | 2.063 | 0.386 | ETS1 | 3.65E+06  | -.MDYK@DHDGDYK.D                 |         | 20.625       | 0            |
| 22112 | 5 | 2.705 | 0.091 | ETS1 | 8626.8    | -.M@*DYKDHDGDYKDHDIDYKDDDDKGR.T  |         | 20.478       | 0            |
| 5608  | 4 | 2.634 | 0.341 | ETS1 | 1.87E+07  | -.M*DYK@DHDGDYKDHDIDYKDDDDK.G    |         | 20.354       | 0            |
| 5156  | 5 | 4.555 | 0.323 | ETS1 | 7.04E+07  | -.M*DYK@DHDGDYKDHDIDYKDDDDKGR.T  |         | 17.562       | 0            |
| 6336  | 3 | 4.887 | 0.329 | ETS1 | 1.02E+06  | -.MDYK@DHDGDYKDHDIDYKDDDDK.G     |         | 17.512       | 0            |
| 5181  | 5 | 2.704 | 0.141 | ETS1 | 2.34E+06  | -.M@*DYK@DHDGDYKDHDIDYKDDDDKGR.T |         | 17.117       | 22.855       |
| 5144  | 4 | 2.715 | 0.165 | ETS1 | 1.74E+05  | K.DHDGDYKDHDIDYK@DDDDKGR.T       |         | 16.198       | 0.0          |
| 5288  | 4 | 3.71  | 0.391 | ETS1 | 1.87E+07  | -.M*DYK@DHDGDYKDHDIDYKDDDDK.G    |         | 15.586       | 0.0          |
| 8467  | 5 | 2.284 | 0.018 | ETS1 | 59054     | -.M*DYK@DHDGDYKDHDIDYKDDDDKGR.T  |         | 13.421       | 0.0          |
| 5652  | 5 | 2.274 | 0.134 | ETS1 | 2.34E+06  | -.M@*DYKDHDGDYK@DHDIDYKDDDDKGR.T |         | 13.348       | 8.2          |

|       |   |       |       |      |          |                                  |        |     |
|-------|---|-------|-------|------|----------|----------------------------------|--------|-----|
| 24855 | 5 | 2.692 | 0.188 | ETS1 | 5.04E+03 | -.M@*DYKDHDGDYKDHDIDYKDDDDKGR.T  | 13.078 | 0.0 |
| 4895  | 5 | 3.605 | 0.405 | ETS1 | 7.04E+07 | -.M@*DYKDHDGDYKDHDIDYKDDDDKGR.T  | 13.078 | 0.0 |
| 26217 | 5 | 2.234 | 0.016 | ETS1 | 3375.1   | -.M@*DYKDHDGDYKDHDIDYKDDDDKGR.T  | 13.078 | 0.0 |
| 25323 | 5 | 2.52  | 0.133 | ETS1 | 5.04E+03 | -.M@*DYKDHDGDYKDHDIDYKDDDDKGR.T  | 13.078 | 0.0 |
| 27013 | 5 | 3.383 | 0.228 | ETS1 | 3375.1   | -.M@*DYKDHDGDYKDHDIDYKDDDDKGR.T  | 13.078 | 0.0 |
| 5749  | 6 | 3.74  | 0.462 | ETS1 | 5.46E+07 | -.MDYK@DHDGDYKDHDIDYKDDDDKGR.T   | 11.777 | 0.0 |
| 5388  | 5 | 2.875 | 0.356 | ETS1 | 7.04E+07 | -.M*DYK@DHDGDYKDHDIDYKDDDDKGR.T  | 10.651 | 0.0 |
| 3827  | 5 | 3.191 | 0.38  | ETS1 | 7.04E+07 | -.M@*DYKDHDGDYKDHDIDYKDDDDKGR.T  | 9.968  | 0.0 |
| 5897  | 5 | 2.924 | 0.028 | ETS1 | 7.04E+07 | -.M@*DYKDHDGDYKDHDIDYKDDDDKGR.T  | 9.968  | 0.0 |
| 3662  | 5 | 3.829 | 0.277 | ETS1 | 7.04E+07 | -.M@*DYKDHDGDYKDHDIDYKDDDDKGR.T  | 9.968  | 0.0 |
| 5268  | 5 | 3.19  | 0.349 | ETS1 | 7.04E+07 | -.M@*DYKDHDGDYKDHDIDYKDDDDKGR.T  | 9.968  | 0.0 |
| 4226  | 5 | 2.529 | 0.376 | ETS1 | 7.04E+07 | -.M@*DYKDHDGDYKDHDIDYKDDDDKGR.T  | 9.968  | 0.0 |
| 5813  | 5 | 4.396 | 0.275 | ETS1 | 1.00E+08 | -.MDYK@DHDGDYKDHDIDYKDDDDKGR.T   | 9.847  | 0.0 |
| 24666 | 5 | 2.921 | 0.231 | ETS1 | 6.36E+03 | -.M@*DYKDHDGDYKDHDIDYKDDDDKGR.T  | 8.152  | 0.0 |
| 25690 | 5 | 2.475 | 0.254 | ETS1 | 4.26E+03 | -.M*DYK@DHDGDYKDHDIDYKDDDDKGR.T  | 7.824  | 0.0 |
| 27822 | 5 | 2.235 | 0.075 | ETS1 | 3375.1   | -.M*DYK@DHDGDYKDHDIDYKDDDDKGR.T  | 7.824  | 0.0 |
| 4830  | 5 | 2.74  | 0.216 | ETS1 | 7.04E+07 | -.M*DYK@DHDGDYKDHDIDYKDDDDKGR.T  | 7.824  | 0.0 |
| 4666  | 5 | 2.786 | 0.42  | ETS1 | 7.04E+07 | -.M*DYK@DHDGDYKDHDIDYKDDDDKGR.T  | 7.824  | 0.0 |
| 4369  | 5 | 2.597 | 0.088 | ETS1 | 7.04E+07 | -.M*DYK@DHDGDYKDHDIDYKDDDDKGR.T  | 7.824  | 0.0 |
| 4439  | 5 | 2.934 | 0.32  | ETS1 | 7.04E+07 | -.M@*DYKDHDGDYKDHDIDYKDDDDKGR.T  | 7.277  | 0.0 |
| 25028 | 5 | 3.44  | 0.392 | ETS1 | 5.04E+03 | -.M@*DYKDHDGDYKDHDIDYKDDDDKGR.T  | 7.277  | 0.0 |
| 5059  | 5 | 3.388 | 0.308 | ETS1 | 7.04E+07 | -.M@*DYKDHDGDYKDHDIDYKDDDDKGR.T  | 7.277  | 0.0 |
| 26594 | 5 | 2.147 | 0.049 | ETS1 | 3.38E+03 | -.M@*DYKDHDGDYKDHDIDYKDDDDKGR.T  | 7.277  | 0.0 |
| 6258  | 5 | 2.132 | 0.028 | ETS1 | 7.04E+07 | -.M@*DYKDHDGDYKDHDIDYKDDDDKGR.T  | 7.277  | 0.0 |
| 4495  | 5 | 2.679 | 0.328 | ETS1 | 7.04E+07 | -.M@*DYKDHDGDYKDHDIDYKDDDDKGR.T  | 7.277  | 0.0 |
| 26937 | 5 | 2.303 | 0.012 | ETS1 | 3.38E+03 | -.M@*DYKDHDGDYKDHDIDYKDDDDKGR.T  | 7.277  | 0.0 |
| 23928 | 5 | 2.337 | 0.023 | ETS1 | 12081.3  | -.M@*DYKDHDGDYKDHDIDYKDDDDKGR.T  | 7.277  | 0.0 |
| 7106  | 5 | 2.12  | 0.22  | ETS1 | 1.57E+05 | -.M@*DYKDHDGDYKDHDIDYKDDDDKGR.T  | 7.277  | 0.0 |
| 3939  | 5 | 3.877 | 0.312 | ETS1 | 7.04E+07 | -.M@*DYKDHDGDYKDHDIDYKDDDDKGR.T  | 7.277  | 0.0 |
| 24962 | 5 | 2.694 | 0.23  | ETS1 | 5.04E+03 | -.M@*DYKDHDGDYKDHDIDYKDDDDKGR.T  | 7.277  | 0.0 |
| 4965  | 5 | 3.261 | 0.151 | ETS1 | 7.04E+07 | -.M@*DYKDHDGDYKDHDIDYKDDDDKGR.T  | 7.277  | 0.0 |
| 5258  | 4 | 2.363 | 0.192 | ETS1 | 1.87E+07 | -.M*DYK@DHDGDYKDHDIDYKDDDDK.G    | 6.893  | 0.0 |
| 5682  | 5 | 2.273 | 0.184 | ETS1 | 1.00E+08 | -.MDYKHDGDYK@DHDIDYKDDDDKGR.T    | 6.753  | 0.0 |
| 7198  | 5 | 2.608 | 0.287 | ETS1 | 1.57E+05 | -.M*DYK@DHDGDYKDHDIDYKDDDDKGR.T  | 6.32   | 0.0 |
| 3980  | 6 | 2.222 | 0.269 | ETS1 | 3.97E+07 | -.M*DYK@DHDGDYKDHDIDYKDDDDKGR.T  | 6.097  | 0.0 |
| 3896  | 5 | 3.132 | 0.338 | ETS1 | 7.04E+07 | -.M*DYK@DHDGDYKDHDIDYKDDDDKGR.T  | 5.44   | 0.0 |
| 14157 | 3 | 2.806 | 0.024 | ETS1 | 4.32E+05 | R.VPSYDSFDSSEDYPAALPNHKPK@GTFK.D | 5.085  | 0.0 |
| 4604  | 5 | 3.532 | 0.352 | ETS1 | 7.04E+07 | -.M@*DYKDHDGDYKDHDIDYKDDDDKGR.T  | 5.021  | 0.0 |
| 4296  | 5 | 3.217 | 0.306 | ETS1 | 7.04E+07 | -.M@*DYKDHDGDYKDHDIDYKDDDDKGR.T  | 5.021  | 0.0 |
| 4716  | 5 | 3.065 | 0.301 | ETS1 | 7.04E+07 | -.M@*DYKDHDGDYKDHDIDYKDDDDKGR.T  | 5.021  | 0.0 |
| 4770  | 5 | 3.321 | 0.242 | ETS1 | 7.04E+07 | -.M@*DYKDHDGDYKDHDIDYKDDDDKGR.T  | 5.021  | 0.0 |
| 6000  | 3 | 1.849 | 0.527 | ETS1 | 3.65E+06 | -.M@DYKDHDGDYK.D                 | 4.16   | 0.0 |
| 6181  | 5 | 2.907 | 0.331 | ETS1 | 1.00E+08 | -.M@DYKDHDGDYKDHDIDYKDDDDKGR.T   | 3.841  | 0.0 |
| 13970 | 4 | 3.637 | 0.058 | ETS1 | 4.58E+06 | R.VPSYDSFDSSEDYPAALPNHK@PKGTFK.D | 3.696  | 0.0 |
| 25708 | 5 | 2.64  | 0.2   | ETS1 | 4260.4   | -.M*DYK@DHDGDYKDHDIDYKDDDDKGR.T  | 3.514  | 0.0 |
| 13188 | 4 | 3.456 | 0.04  | ETS1 | 94388.5  | R.VPSYDSFDSSEDYPAALPNHKPK@GTFK.D | 3.359  | 0.0 |
| 14042 | 4 | 3.058 | 0.076 | ETS1 | 4.58E+06 | R.VPSYDSFDSSEDYPAALPNHKPK@GTFK.D | 3.359  | 0.0 |
| 25240 | 5 | 3.725 | 0.428 | ETS1 | 5038.9   | -.M@*DYKDHDGDYKDHDIDYKDDDDKGR.T  | 3.213  | 0.0 |
| 24947 | 5 | 3.227 | 0.451 | ETS1 | 5.04E+03 | -.M@*DYKDHDGDYKDHDIDYKDDDDKGR.T  | 3.213  | 0.0 |
| 5922  | 5 | 4.047 | 0.383 | ETS1 | 1.00E+08 | -.MDYK@DHDGDYKDHDIDYKDDDDKGR.T   | 2.345  | 0.0 |
| 26515 | 5 | 2.704 | 0.264 | ETS1 | 3.38E+03 | -.M*DYK@DHDGDYKDHDIDYKDDDDKGR.T  | 2.05   | 0.0 |
| 3756  | 5 | 3.375 | 0.334 | ETS1 | 7.04E+07 | -.M@*DYKDHDGDYKDHDIDYKDDDDKGR.T  | 1.852  | 0.0 |
| 4552  | 5 | 2.844 | 0.256 | ETS1 | 7.04E+07 | -.M@*DYKDHDGDYKDHDIDYKDDDDKGR.T  | 1.852  | 0.0 |
| 6229  | 4 | 2.638 | 0.352 | ETS1 | 4.38E+06 | -.MDYKHDGDYK@DHDIDYKDDDDK.G      | 1.627  | 0.0 |
| 3997  | 5 | 2.591 | 0.256 | ETS1 | 7.04E+07 | -.M@*DYKDHDGDYKDHDIDYKDDDDKGR.T  | 0.919  | 0.0 |
